# Supplementary material for: Synthesis of a Multi-Template Molecular Imprinted Bulk Polymer for the Adsorption of Non-Steroidal Inflammatory and Antiretroviral Drugs
Source: MDPI journal article supplement (doi:10.3390/app14083320), 2024-04-15
Supplement: s1 [file s1]

**Synthesis of a multi-template molecular imprinted bulk polymer for the adsorption of non-steroidal inflammatory and antiretroviral drugs**

**Sisonke Sigonya<sup>a</sup>, Teboho Clement Mokhenab, Paul Mayer<sup>c\*</sup>, Phumlane Selby Mdluli<sup>b</sup>, Talent Raymond Makhanya<sup>a</sup>, Thabang Hendrica Mokhothu<sup>a</sup>**

*<sup>a</sup>Department of Chemistry, Durban University of Technology, P.O Box 1334, Durban, 4000, South Africa*

*<sup>b</sup>DST/Mintek NIC, Advanced Materials Division, Mintek, 200 Malibongwe Drive, Randburg, South*

*<sup>c</sup>Department of Chemistry and Biomolecular Sciences, University of Ottawa, 10 Marie-Curie Pvt, Ottawa ON Canada K1N 6N6*

*\*Corresponding Author: PaulMichael.Mayer@uottawa.ca*

**Supplementary Data**

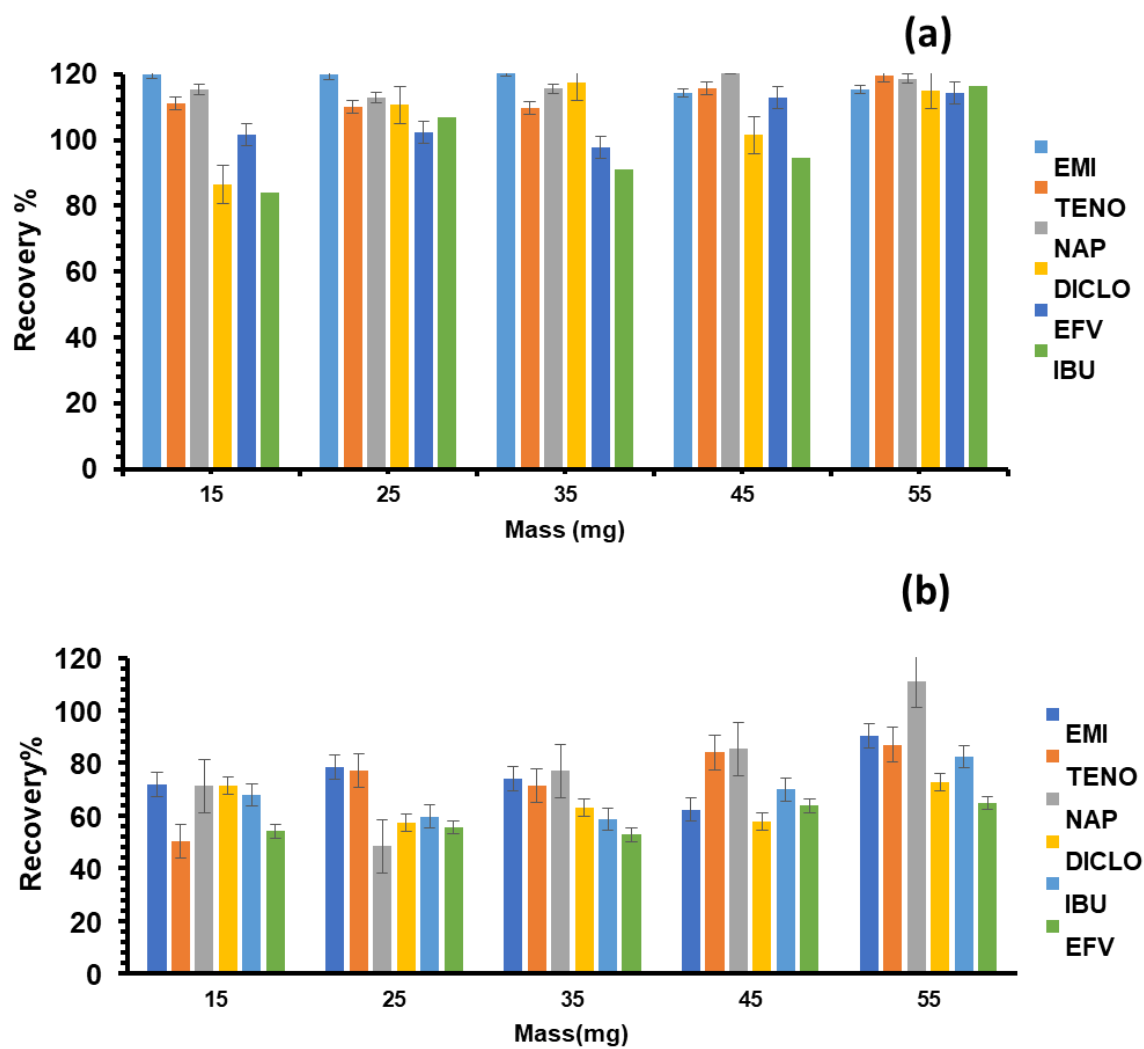

Figure S1: Mass effects of (a) MIP and (b) NIP for ARVs and NSAIDs recoveries

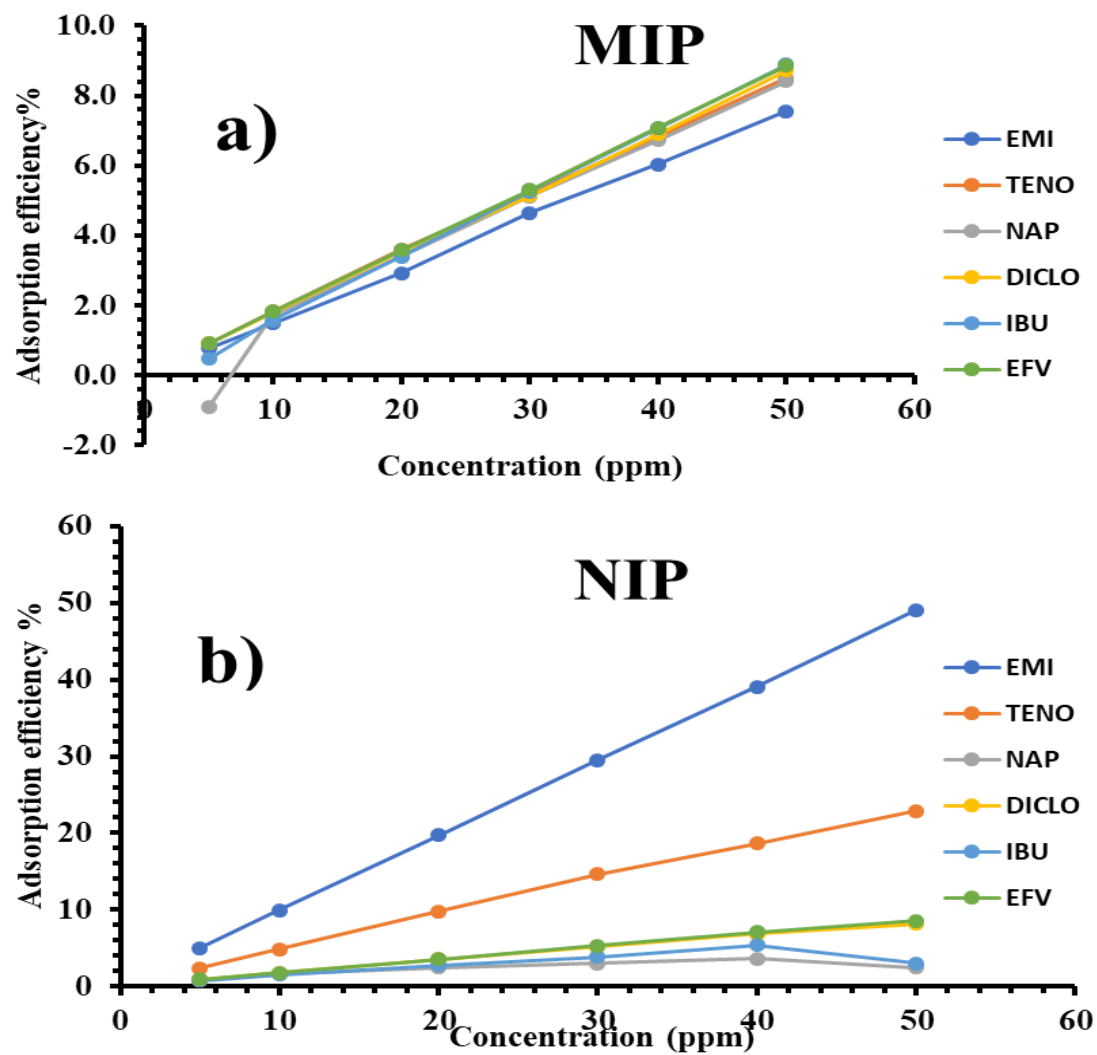

Figure S2: Effects of target initial concentration on the adsorption capacity with (a) MIP and (b) NIP.

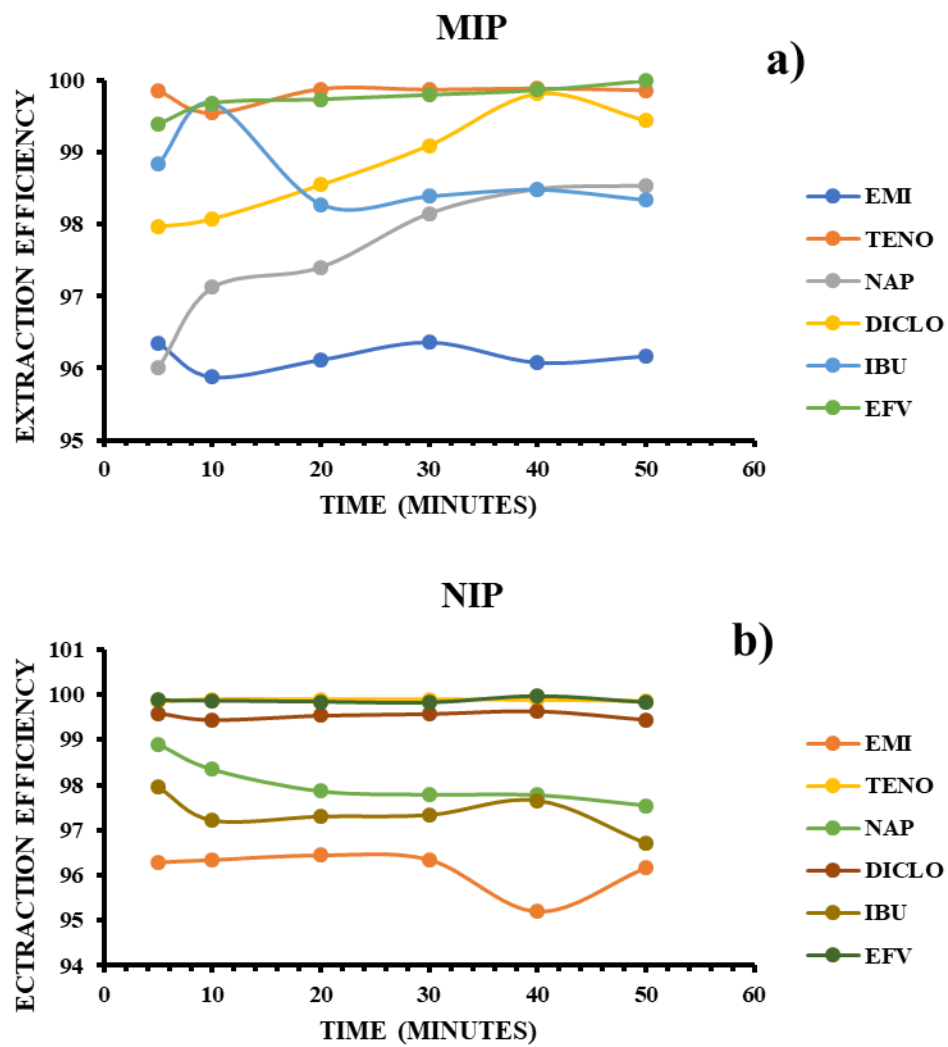

Figure S3: Extraction efficiency (a) MIP and (b) NIP based on template contact times.
